# Supplementary material for: The Impact of Adjustment for Socioeconomic Status on Comparisons of Cancer Incidence between Two European Countries
Source: Hindawi journal article supplement (doi:10.1155/2013/612514), 2013-01-01
Supplement: f1 [file 612514.f1.pdf]

**Supplementary table 1: Population and number of areas (wards and EDs) included in each SES category**

|                         | Republic of Ireland |             |                       | Northern Ireland |             |                       | Ireland         |             |                       |
|-------------------------|---------------------|-------------|-----------------------|------------------|-------------|-----------------------|-----------------|-------------|-----------------------|
|                         | Number of areas     | Population* | % of total population | Number of areas  | Population* | % of total population | Number of areas | Population* | % of total population |
| <b>Highest SES (Q1)</b> | 967                 | 754,815     | 19%                   | 114              | 358,345     | 21%                   | 1,081           | 1,113,160   | 20%                   |
| <b>Quintile 2</b>       | 695                 | 894,496     | 23%                   | 78               | 225,691     | 13%                   | 773             | 1,120,187   | 20%                   |
| <b>Quintile 3</b>       | 672                 | 831,031     | 21%                   | 104              | 283,577     | 17%                   | 776             | 1,114,608   | 20%                   |
| <b>Quintile 4</b>       | 593                 | 803,616     | 21%                   | 121              | 320,098     | 19%                   | 714             | 1,123,713   | 20%                   |
| <b>Lowest SES (Q5)</b>  | 428                 | 610,592     | 16%                   | 165              | 507,827     | 30%                   | 593             | 1,118,419   | 20%                   |
| <b>Total</b>            | 3,355               | 3,894,549   |                       | 582              | 1,695,538   |                       | 3,937           | 5,590,087   |                       |

\* Annual average of combined 1995-2007 population.

**Supplementary table 2: Cancer incidence rate ratios (with 95% confidence intervals) for SES quintiles adjusted for age, all Ireland, 1995-2007\***

| Cancer site  | Sex    | Cancer incidence rate ratio |                         |                         |                         |                            |
|--------------|--------|-----------------------------|-------------------------|-------------------------|-------------------------|----------------------------|
|              |        | Quintile 1<br>(highest SES) | Quintile 2              | Quintile 3              | Quintile 4              | Quintile 5<br>(lowest SES) |
| Head & neck  | Male   | 1.00                        | 1.03 (0.94,1.14)        | <b>1.13 (1.02,1.24)</b> | <b>1.31 (1.19,1.43)</b> | <b>1.65 (1.51,1.81)</b>    |
|              | Female | 1.00                        | 1.09 (0.94,1.26)        | 1.07 (0.93,1.24)        | <b>1.24 (1.08,1.43)</b> | <b>1.58 (1.38,1.81)</b>    |
| Oesophagus   | Male   | 1.00                        | <b>1.13 (1.02,1.26)</b> | <b>1.14 (1.02,1.26)</b> | <b>1.22 (1.10,1.35)</b> | <b>1.18 (1.06,1.31)</b>    |
|              | Female | 1.00                        | 0.99 (0.87,1.13)        | 0.99 (0.87,1.13)        | 1.01 (0.89,1.15)        | 1.00 (0.88,1.14)           |
| Stomach      | Male   | 1.00                        | <b>1.11 (1.01,1.22)</b> | <b>1.12 (1.02,1.23)</b> | <b>1.22 (1.11,1.33)</b> | <b>1.46 (1.34,1.60)</b>    |
|              | Female | 1.00                        | 1.06 (0.94,1.19)        | 1.06 (0.94,1.19)        | <b>1.21 (1.08,1.35)</b> | <b>1.45 (1.30,1.62)</b>    |
| Colorectal   | Male   | 1.00                        | <b>1.07 (1.02,1.12)</b> | <b>1.08 (1.04,1.13)</b> | <b>1.10 (1.05,1.15)</b> | <b>1.13 (1.08,1.18)</b>    |
|              | Female | 1.00                        | 1.02 (0.97,1.08)        | 1.01 (0.96,1.06)        | 1.01 (0.96,1.06)        | 1.04 (0.99,1.09)           |
| Lung         | Male   | 1.00                        | <b>1.14 (1.07,1.21)</b> | <b>1.15 (1.08,1.22)</b> | <b>1.41 (1.33,1.49)</b> | <b>1.75 (1.65,1.85)</b>    |
|              | Female | 1.00                        | <b>1.14 (1.06,1.23)</b> | <b>1.19 (1.10,1.28)</b> | <b>1.46 (1.36,1.57)</b> | <b>1.78 (1.66,1.91)</b>    |
| Melanoma     | Male   | 1.00                        | 1.04 (0.95,1.15)        | <b>0.88 (0.80,0.98)</b> | <b>0.84 (0.76,0.93)</b> | <b>0.73 (0.65,0.81)</b>    |
|              | Female | 1.00                        | <b>0.91 (0.84,0.99)</b> | <b>0.82 (0.75,0.90)</b> | <b>0.82 (0.75,0.89)</b> | <b>0.67 (0.61,0.73)</b>    |
| Breast       | Female | 1.00                        | 1.00 (0.96,1.03)        | <b>0.95 (0.92,0.99)</b> | <b>0.97 (0.93,1.00)</b> | <b>0.93 (0.90,0.97)</b>    |
| Cervix Uteri | Female | 1.00                        | 1.12 (1.00,1.26)        | <b>1.20 (1.07,1.34)</b> | <b>1.43 (1.28,1.60)</b> | <b>1.63 (1.46,1.82)</b>    |
| Corpus Uteri | Female | 1.00                        | 1.01 (0.93,1.11)        | 1.03 (0.94,1.12)        | 1.03 (0.94,1.12)        | 1.01 (0.93,1.11)           |

|                               |               |      |                         |                         |                         |                         |
|-------------------------------|---------------|------|-------------------------|-------------------------|-------------------------|-------------------------|
| <b>Ovary</b>                  | <b>Female</b> | 1.00 | 1.04 (0.96,1.12)        | <b>1.10 (1.01,1.19)</b> | 1.07 (0.99,1.15)        | 0.96 (0.88,1.04)        |
|                               |               |      |                         |                         |                         |                         |
| <b>Prostate</b>               | <b>Male</b>   | 1.00 | 1.04 (0.99,1.08)        | 0.97 (0.93,1.01)        | <b>0.95 (0.91,1.00)</b> | <b>0.87 (0.83,0.91)</b> |
|                               |               |      |                         |                         |                         |                         |
| <b>Kidney</b>                 | <b>Male</b>   | 1.00 | 1.04 (0.94,1.15)        | 1.01 (0.91,1.12)        | <b>1.16 (1.05,1.27)</b> | 1.01 (0.92,1.12)        |
|                               | <b>Female</b> | 1.00 | <b>1.17 (1.03,1.33)</b> | 1.10 (0.96,1.25)        | 1.11 (0.98,1.27)        | <b>1.16 (1.02,1.32)</b> |
|                               |               |      |                         |                         |                         |                         |
| <b>Bladder</b>                | <b>Male</b>   | 1.00 | 1.05 (0.96,1.14)        | 1.02 (0.94,1.11)        | <b>1.09 (1.01,1.18)</b> | <b>1.16 (1.07,1.26)</b> |
|                               | <b>Female</b> | 1.00 | 1.04 (0.91,1.19)        | 1.05 (0.92,1.19)        | 1.07 (0.94,1.21)        | <b>1.22 (1.08,1.39)</b> |
|                               |               |      |                         |                         |                         |                         |
| <b>Brain</b>                  | <b>Male</b>   | 1.00 | 1.09 (0.97,1.21)        | 1.09 (0.97,1.22)        | 0.96 (0.86,1.08)        | 0.94 (0.85,1.07)        |
|                               | <b>Female</b> | 1.00 | 1.07 (0.94,1.22)        | 1.05 (0.93,1.20)        | 0.95 (0.83,1.08)        | 0.95 (0.84,1.09)        |
|                               |               |      |                         |                         |                         |                         |
| <b>Non-Hodgkin's Lymphoma</b> | <b>Male</b>   | 1.00 | 1.07 (0.98,1.16)        | 1.03 (0.95,1.13)        | 0.99 (0.91,1.08)        | 1.00 (0.92,1.09)        |
|                               | <b>Female</b> | 1.00 | 0.97 (0.89,1.06)        | 0.97 (0.89,1.07)        | 0.92 (0.84,1.01)        | 0.94 (0.86,1.03)        |
|                               |               |      |                         |                         |                         |                         |
| <b>Leukaemia</b>              | <b>Male</b>   | 1.00 | 0.96 (0.88,1.05)        | 0.96 (0.88,1.06)        | 0.96 (0.88,1.05)        | 0.91 (0.83,1.00)        |
|                               | <b>Female</b> | 1.00 | 0.96 (0.86,1.08)        | 0.98 (0.88,1.09)        | 0.99 (0.88,1.10)        | 0.95 (0.85,1.06)        |

\* IRRs shown in bold font are statistically significantly different from 1 (p<0.05)

**Supplementary table 3: Cancer incidence rate ratios (with 95% confidence intervals) - Northern Ireland compared to Republic of Ireland adjusted for (a) age and (b) age and socio-economic status (SES)**

| Cancer site            | Cancer incidence rate ratio (NI vs. RoI) |                         |                         |                         |
|------------------------|------------------------------------------|-------------------------|-------------------------|-------------------------|
|                        | Male                                     |                         | Female                  |                         |
|                        | Age-adjusted                             | Age and SES adjusted    | Age-adjusted            | Age and SES adjusted    |
| Head & neck            | 1.05 (0.99,1.12)                         | 0.99 (0.93,1.05)        | <b>1.21 (1.10,1.32)</b> | <b>1.15 (1.05,1.26)</b> |
| Oesophagus             | 1.02 (0.96,1.10)                         | 1.02 (0.95,1.10)        | <b>0.92 (0.84,1.00)</b> | <b>0.91 (0.83,1.00)</b> |
| Stomach                | 1.06 (0.99,1.12)                         | 1.02 (0.96,1.08)        | 1.01 (0.94,1.09)        | 0.97 (0.90,1.04)        |
| Colorectal             | 0.97 (0.94,1.00)                         | <b>0.97 (0.94,1.00)</b> | 1.03 (1.00,1.07)        | 1.03 (1.00,1.07)        |
| Lung                   | <b>1.11 (1.06,1.16)</b>                  | 1.03 (0.99,1.07)        | <b>1.07 (1.01,1.13)</b> | 0.98 (0.94,1.03)        |
| Melanoma               | <b>0.92 (0.85,0.99)</b>                  | 0.95 (0.88,1.02)        | <b>0.86 (0.81,0.92)</b> | <b>0.88 (0.83,0.94)</b> |
| Breast                 |                                          |                         | 1.01 (0.98,1.03)        | 1.01 (0.99,1.04)        |
| Cervix Uteri           |                                          |                         | <b>0.90 (0.84,0.97)</b> | <b>0.85 (0.79,0.92)</b> |
| Corpus Uteri           |                                          |                         | <b>1.11 (1.05,1.18)</b> | <b>1.12 (1.06,1.19)</b> |
| Ovary                  |                                          |                         | 1.00 (0.95,1.06)        | 1.02 (0.96,1.07)        |
| Prostate               | <b>0.71 (0.69,0.74)</b>                  | <b>0.72 (0.70,0.74)</b> |                         |                         |
| Kidney                 | 0.95 (0.89,1.02)                         | 0.96 (0.89,1.02)        | 1.04 (0.96,1.13)        | 1.04 (0.95,1.13)        |
| Bladder                | <b>0.92 (0.87,0.97)</b>                  | <b>0.91 (0.85,0.96)</b> | <b>0.86 (0.79,0.93)</b> | <b>0.83 (0.76,0.91)</b> |
| Brain                  | <b>0.90 (0.83,0.97)</b>                  | <b>0.91 (0.84,0.99)</b> | <b>0.80 (0.73,0.88)</b> | <b>0.81 (0.73,0.89)</b> |
| Non-Hodgkin's Lymphoma | 1.04 (0.98,1.10)                         | 1.05 (0.98,1.11)        | <b>1.14 (1.08,1.22)</b> | <b>1.15 (1.08,1.22)</b> |
| Leukaemia              | <b>0.77 (0.72,0.82)</b>                  | <b>0.77 (0.72,0.82)</b> | <b>0.83 (0.77,0.89)</b> | <b>0.82 (0.76,0.89)</b> |

\* IRRs shown in bold font are statistically significantly different from 1 ( $p < 0.05$ )
